# Supplementary material for: Efficient ceria nanostructures for enhanced solar fuel production via high-temperature thermochemical redox cycles
Source: Royal Society of Chemistry journal article supplement (doi:10.1039/c6ta02187e), 2016-01-01
Supplement: c6ta02187e1.pdf [file c6ta02187e1.pdf]

## SUPPLEMENTARY INFORMATION

### Efficient Ceria Nanostructures for Enhanced Solar Fuel Production via High-Temperature Thermochemical Redox Cycles

Xiang Gao<sup>1</sup>, Alejandro Vidal<sup>2</sup>, Alicia Bayon<sup>3</sup>, Roman Bader<sup>2</sup>, Jim Hinkley<sup>3</sup>, Wojciech Lipiński<sup>2\*</sup>, Antonio Tricoli<sup>1\*</sup>

<sup>1</sup>Nanotechnology Research Laboratory, the Australian National University, Canberra ACT 2601, Australia

<sup>2</sup>Solar Thermal Group, the Australian National University, Canberra ACT 2601, Australia

<sup>3</sup>CSIRO Energy Technology, P. O. Box 330, Newcastle, NSW 2300, Australia

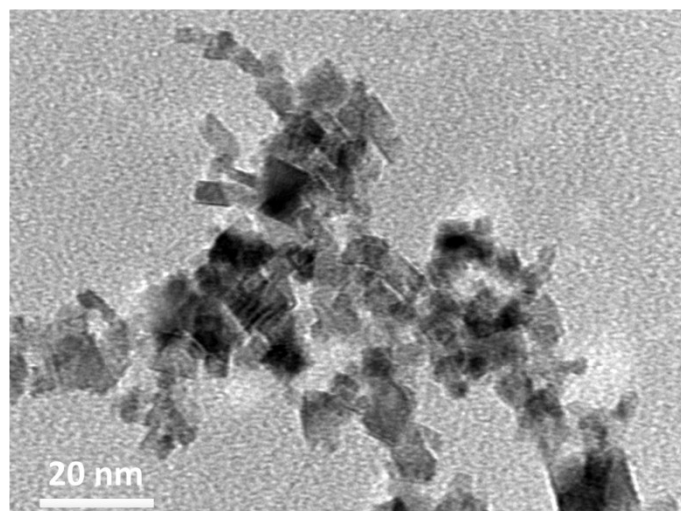

**Figure S1.** TEM images of the as-prepared flame-made agglomerates showing primary particles of 6-13 nm.

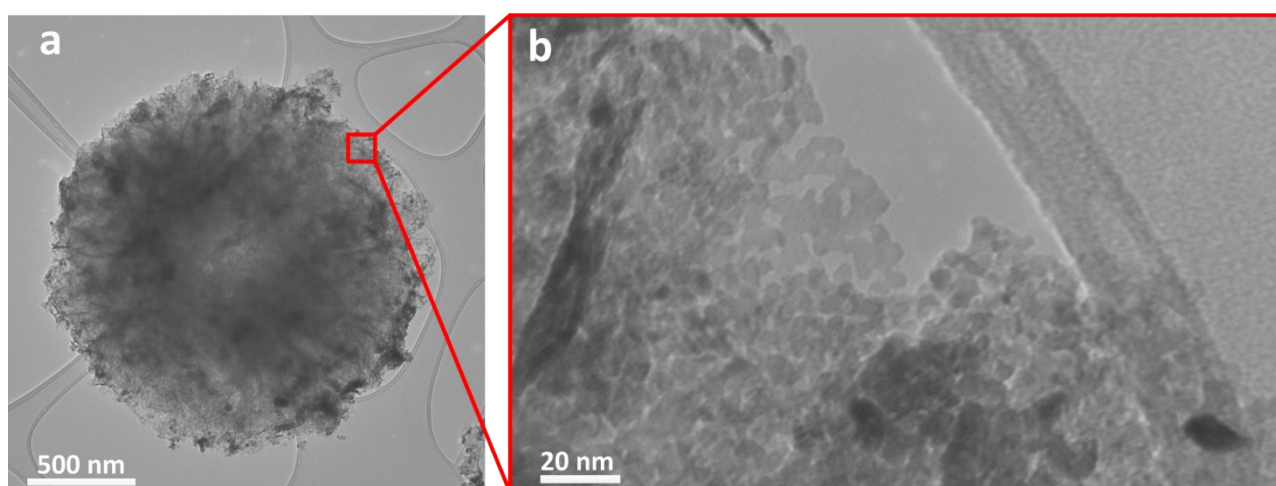

**Figure S2.** TEM micrographs of the as-prepared flower-like agglomerates showing (a) a single flower-like spherical agglomerate, and (b) the primary particles.

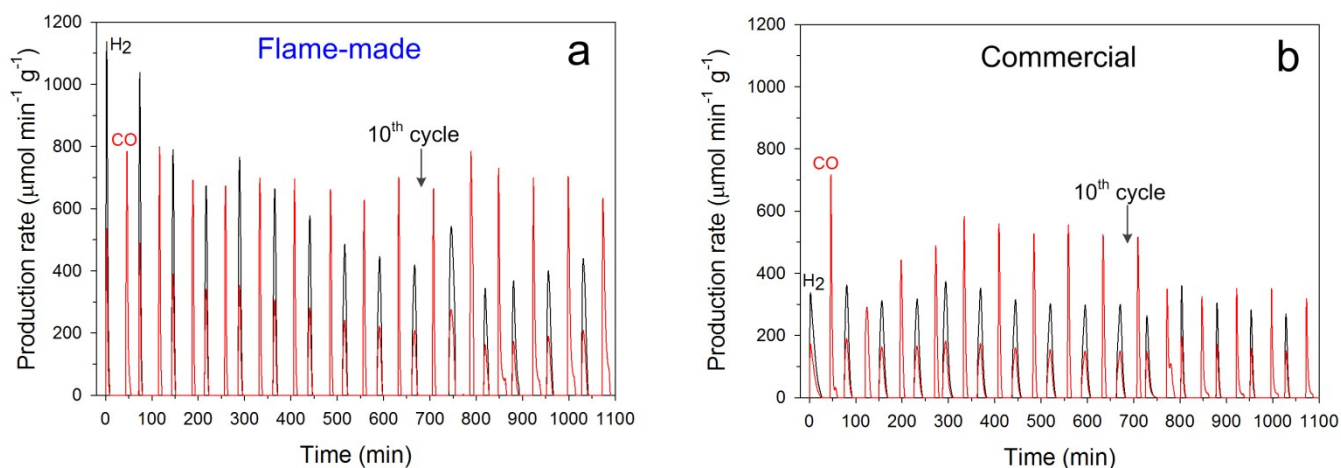

**Figure S3.** H<sub>2</sub> and CO production rates of the (a) flame-made ceria and (b) commercial ceria during 15 isothermal MPO-CDS cycles at 1173 K.

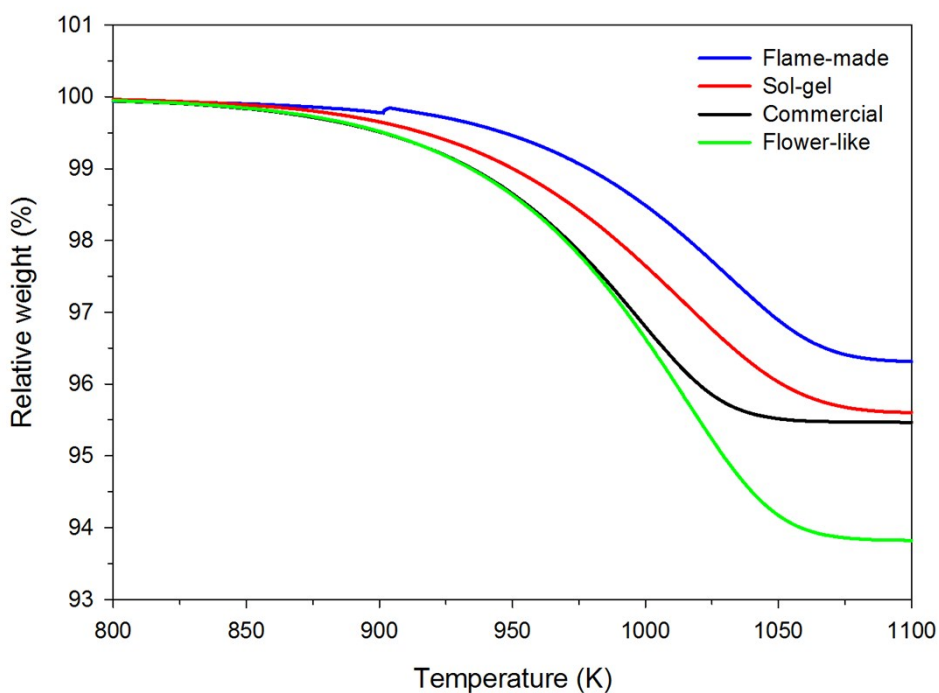

**Figure S4a.** TGA profile in air of the flame-made (blue), flower-like (green), sol-gel (red) and commercial (black) ceria after 10 MPO-CDS cycles. Measurement conditions: heating rate 5 K min<sup>-1</sup>, air flow rate 100 mL min<sup>-1</sup>, sample size 25-35 mg.

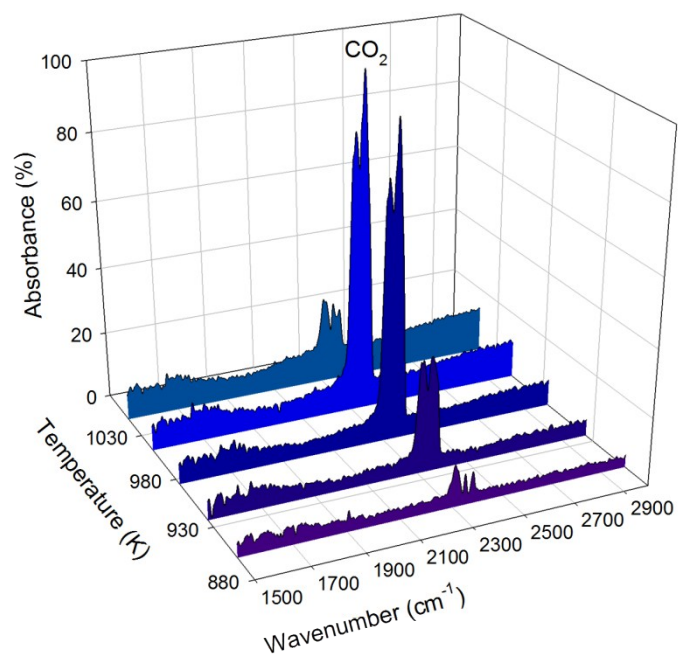

**Figure S4b.** FTIR-EGA profile of CO<sub>2</sub> evolution during the temperature programmed oxidation of the flame-made ceria after 10 MPO-CDS cycles. CO<sub>2</sub> production is attributed to oxidation of the carbon deposits.
